# Supplementary material for: Protein–phenolic interactions in lentil and wheat crackers with onion skin phenolics: effects of processing and in vitro gastrointestinal digestion
Source: Royal Society of Chemistry journal article supplement (doi:10.1039/d2fo02885a), 2023-01-01
Supplement: d2fo02885a1.xlsx [file d2fo02885a1.xlsx]

## Sheet: Wheat Crackers
Sample	Control				%4 Onion Skin Powder				%1 Onion Skin Powder				%0.27 Onion Skin extract				%0.27 Onion Skin extract				%0.075 Onion Skin extract				%0.075 Onion Skin extract				%0.1 Quercetin				%0.025 Quercetin
	Control-W				W.S2				W.S1				W.E2				W.E2				W.E1				W.E1				W.Q2				W.Q1
	L*	a*	b*		L*	a*	b*		L*	a*	b*		L*	a*	b*		L*	a*	b*		L*	a*	b*		L*	a*	b*		L*	a*	b*		L*	a*	b*
	75.85	2.42	30.97		56.72	12.4	26.03		64.83	9.76	25.09		67.19	7.73	30.42		65.93	8.89	32.48		70.25	7.04	32.48		64.39	9.18	34.99		68.08	6.58	35.19		73.27	4.15	33.58
	73.58	2.68	31		56.2	12.88	26.29		60.68	9.43	25.83		66.65	8.35	30.4		66.99	8.46	32.26		70.83	6.66	31.11		65.84	9.22	34.84		68.62	5.98	35.57		73.3	3.46	32.65
	75.11	2.82	32.06		56.35	12.97	26.63		60.64	9.5	25.42		65.43	8.26	30.6		67.53	8.41	32.7		70.34	6.68	32.4		65.93	9.14	34.68		67.29	6.48	36.48		71.88	3.03	31.17
	74.8467	2.64	31.3433		56.4233	12.75	26.3167		62.05	9.56333	25.4467		66.4233	8.11333	30.4733		66.8167	8.58667	32.48		70.4733	6.79333	31.9967		65.3867	9.18	34.8367		67.9967	6.34667	35.7467		72.8167	3.54667	32.4667
	78.83	0.13	28.98		58.47	12.24	27.87		64.46	9.74	32.32		63.53	9.8	32.23		66.78	8.52	32.42		67.31	8.72	33.84		64.87	8.55	33.61		69.55	6.17	38.3		69.96	6.72	35.72
	78.53	0	28.84		59.24	12.61	28.21		64.44	8.5	32.32		64.25	9.45	31.91		63.67	9.5	32.59		67.74	8.01	32.93		66.02	8.77	34.84		70.13	5.32	37.69		68.72	6.56	35.25
	78.57	-0.45	27.3		59.11	12.53	28.15		66.65	8.4	32.64		64.37	9.61	32.18		63.41	10.01	32.72		67.28	8.52	33.52		65.08	8.83	34.43		70.44	5.18	37.48		72.1	4.92	34.39
	78.6433	-0.106667	28.3733		58.94	12.46	28.0767		65.1833	8.88	32.4267		64.05	9.62	32.1067		64.62	9.34333	32.5767		67.4433	8.41667	33.43		65.3233	8.71667	34.2933		70.04	5.55667	37.8233		70.26	6.06667	35.12
	72.73	4.81	32.97		58.3	12.57	27.68		64.38	9.9	33.24		68.68	7.7	30.47		68.58	7.72	30.95		65.2	8.36	34.37		67.88	7.03	33.33		72.82	4.19	36.35		72.21	3.92	33.77
	71.47	4.77	32.05		57.54	12.82	26.57		64.37	9.7	32.68		66.96	7.98	30.76		68.76	7.34	30.16		67.1	7.38	33.65		69.12	6.04	33		73.47	3.47	36		73.49	3.81	34.93
	72.3	4.72	32.35		56.21	12.55	25.68		63.76	9.1	32.36		66.46	8.99	31.71		68.58	7.64	30.59		67.51	8.02	34.74		70.49	6.09	34.29		71.72	3.58	36.01		73.39	3.98	35.57
	72.1667	4.76667	32.4567		57.35	12.6467	26.6433		64.17	9.56667	32.76		67.3667	8.22333	30.98		68.64	7.56667	30.5667		66.6033	7.92	34.2533		69.1633	6.38667	33.54		72.67	3.74667	36.12		73.03	3.90333	34.7567
	76.36	2.4	29.39		58.7	12.05	26.34		62.39	8.69	30.77		64.74	9.94	32.45		67.72	8.41	31.85		69.72	6.84	32.2		71.28	6.29	34.14		66.22	8.04	35.94		73.37	3.37	32.63
	77.57	2.24	29.32		58.99	12.35	27.05		58.43	8.71	29.11		64.34	9.71	31.84		66.48	7.21	29.74		71.13	5.76	31.09		69.37	5.73	32.4		66.49	7.53	35.2		75.34	2.13	31.88
	75.37	3.28	32.18		56.95	13.62	27.05		59.67	8.69	30.11		64.43	9.89	32.74		68.36	7.26	30.21		69.84	6.72	32.75		70.27	6.6	33.95		67.08	7.4	35.01		75.97	1.72	30.84
	76.4333	2.64	30.2967		58.2133	12.6733	26.8133		60.1633	8.69667	29.9967		64.5033	9.84667	32.3433		67.52	7.62667	30.6		70.23	6.44	32.0133		70.3067	6.20667	33.4967		66.5967	7.65667	35.3833		74.8933	2.40667	31.7833
	77.52	0.83	30.37		57.63	12.36	27.94		63.27	8.5	31.37		66.14	11.02	31.53		67.25	8.35	32.02		66.38	8.88	34.02		70.93	5.9	34.2		68.86	6.59	36.61		76.66	0.59	32
	77.32	1.6	30.69		59.04	11.52	27.58		60.62	8.65	29.22		64.96	10.29	31.39		68.22	7.97	31.23		65.49	8.79	33.86		70.24	6.38	34.68		69.29	5.99	35.42		75.2	0.33	31.26
	77.83	0.69	30.44		58.1	10.78	26.31		60.16	9.15	31.09		65.97	8.83	31.99		68.37	8.18	31.23		65.86	8.56	33.71		69.73	6.34	34.26		69.57	5.81	36.1		74.68	1.04	32.22
	77.5567	1.04	30.5		58.2567	11.5533	27.2767		61.35	8.76667	30.56		65.69	10.0467	31.6367		67.9467	8.16667	31.4933		65.91	8.74333	33.8633		70.3	6.20667	34.38		69.24	6.13	36.0433		75.5133	0.653333	31.8267
Ort.	75.9293	2.196	30.594		57.8367	12.4167	27.0253		62.5833	9.09467	30.238		65.6067	9.17	31.508		67.1087	8.258	31.5433		68.132	7.66267	33.1113		68.096	7.33933	34.1093		69.3087	5.88733	36.2233		73.3027	3.31533	33.1907
SS	2.52972	1.8467	1.50496		0.970822	0.494245	0.682193		2.05788	0.43431	2.92701		1.36125	0.927583	0.778148		1.54071	0.736688	0.973573		2.09951	1.00663	1.05111		2.54519	1.47974	0.577848		2.28661	1.42234	0.940198		2.06068	1.99255	1.62326
	Control				%4 Onion Skin Powder				%1 Onion Skin Powder				%0.27 Onion Skin extract				%0.27 Onion Skin extract				%0.075 Onion Skin extract				%0.075 Onion Skin extract				%0.1 Quercetin				%0.025 Quercetin
	Control-W				W.S2				W.S1				W.E2				W.E2				W.E1				W.E1				B.15				B.17
	L*	a*	b*		L*	a*	b*		L*	a*	b*		L*	a*	b*		L*	a*	b*		L*	a*	b*		L*	a*	b*		L*	a*	b*		L*	a*	b*
	76.16	-0.27	25.83		60.83	11.76	25.09		66.92	8.08	29.26		63.59	9.75	32.48		70.07	6.55	28.27		72.84	5.18	30.34		67.6	8.63	35.68		69.45	5.97	34.76		74.87	3.76	33.21
	75.48	-0.44	25.8		60.68	12.43	25.83		67.96	7.48	29.32		64.6	9.07	31.79		70.1	6.61	28.76		72.26	4.92	30.27		67.23	8.7	35.3		72.18	4.96	34.47		75.82	2.37	31.85
	76.89	-0.16	27.45		60.64	12.5	25.42		69.09	7.08	30.09		65.58	8.79	31.08		69.94	7.08	29.21		72.17	5.3	30.69		68.15	8.33	35.07		72.24	4.84	34.16		75.25	2.93	32.31
	76.1767	-0.29	26.36		60.7167	12.23	25.4467		67.99	7.54667	29.5567		64.59	9.20333	31.7833		70.0367	6.74667	28.7467		72.4233	5.13333	30.4333		67.66	8.55333	35.35		71.29	5.25667	34.4633		75.3133	3.02	32.4567
	78.7	0.86	29.09		61.56	11.58	24.14		68.85	7.31	31.87		62.4	10.39	33.24		70.23	7.12	28.73		71.99	6.13	32.15		67.59	8.5	35.38		71.34	5.91	35.68		74.48	4.35	33.22
	78.56	0.07	28.6		62.08	11.85	24.74		69.23	7.25	29.52		61.48	10.35	33		69.86	7.03	28.6		72.56	5.49	31.14		67.82	8.38	35.28		72.51	5	34.21		74.23	4.11	33.59
	78.66	0.2	27.36		60.13	12.03	24.3		70.11	7.02	29.35		61.44	10.34	32.27		70.31	6.73	27.75		71.29	6.57	32.34		68.06	8.33	35.52		72.1	4.92	34.34		73.91	4.15	33.27
	78.64	0.376667	28.35		61.2567	11.82	24.3933		69.3967	7.19333	30.2467		61.7733	10.36	32.8367		70.1333	6.96	28.36		71.9467	6.06333	31.8767		67.8233	8.40333	35.3933		71.9833	5.27667	34.7433		74.2067	4.20333	33.36
	75.11	3.82	32.79		59.19	11.82	25.55		68.06	7.5	31.07		64.47	9.78	32.63		68.83	7.49	30.76		74.86	6.28	27		70.72	6.9	34.44		74.97	2.47	34.6		70.11	-0.68	29.91
	76.26	3.66	31.52		59.41	12.33	25.25		69.63	7.61	29.91		65.68	8.63	31.73		68.86	7.39	30.99		73.8	6.32	27.06		71.96	6.24	33.79		75.1	2.73	34.78		78.55	-0.8	29.55
	73.67	4.02	30		57.54	12.79	25.21		70.28	8.01	29.66		65.88	9.16	31.84		68.9	7.86	31.93		72.69	6.52	27.85		71.65	6.43	33.66		74.86	2.72	34.19		75.59	-0.92	28.59
	75.0133	3.83333	31.4367		58.7133	12.3133	25.3367		69.3233	7.70667	30.2133		65.3433	9.19	32.0667		68.8633	7.58	31.2267		73.7833	6.37333	27.3033		71.4433	6.52333	33.9633		74.9767	2.64	34.5233		74.75	-0.8	29.35
	80.32	0.5	27.05		60.25	11.67	26.08		69	9.71	28.82		62.95	10.09	32.85		67.8	7.68	31.29		75.71	5.69	30.58		60.03	7.66	35.02		75.58	3.12	35.01		78.08	0.71	32.32
	80.71	0.7	26.27		59.59	12.5	25.44		69.51	8.81	29.24		63.9	9.73	32.68		67.25	7.3	29.44		73.38	5.72	28.98		68.68	7.56	34.97		76.33	2.97	34.54		77.46	0.77	31.83
	75.55	2.57	27.6		57.61	12.91	24.67		68.45	8.42	27.23		65.57	9.65	33.16		68.77	7.63	30.65		74.43	5.08	29.65		68.82	7.57	35.25		75.5	2.87	34.13		77.89	1.23	32.47
	78.86	1.25667	26.9733		59.15	12.36	25.3967		68.9867	8.98	28.43		64.14	9.82333	32.8967		67.94	7.53667	30.46		74.5067	5.49667	29.7367		65.8433	7.59667	35.08		75.8033	2.98667	34.56		77.81	0.903333	32.2067
	79.05	1.55	30.94		65.11	9.82	25.49		66.06	7.79	29.6		66.52	8.32	30.85		68	7.17	30.55		72.38	4.38	29.68		68.17	7.73	34.09		68.08	6.43	34.7		71.05	6.66	35.61
	79.04	1.11	30.72		63.78	10.6	35.49		68.89	7.47	30.36		66.96	8.35	31.19		69.18	6.81	29.2		73.54	4.42	31.04		68.75	8.03	34.5		70.07	5.99	35.42		72.01	6.35	35.19
	78.05	1.31	31.29		62.98	10.82	25.27		67.7	7.76	28.23		65.97	8.83	31.99		68.84	6.97	28.72		72.83	4.48	31.06		67.26	8.12	33.61		70.22	6.66	35.76		70.57	6.48	35.19
	78.7133	1.32333	30.9833		63.9567	10.4133	28.75		67.55	7.67333	29.3967		66.4833	8.5	31.3433		68.6733	6.98333	29.49		72.9167	4.42667	30.5933		68.06	7.96	34.0667		69.4567	6.36	35.2933		71.21	6.49667	35.33
Ort.	77.4807	1.3	28.8207		60.7587	11.8273	25.8647		68.6493	7.82	29.5687		64.466	9.41533	32.1853		69.1293	7.16133	29.6567		73.1153	5.49867	29.9887		68.166	7.80733	34.7707		72.702	4.504	34.7167		74.658	2.76467	32.5407
SS	1.7716	1.56532	2.3027		2.07655	0.818767	1.67052		0.83214	0.679591	0.741884		1.74724	0.705764	0.673587		0.938679	0.374274	1.18822		1.03273	0.769179	1.68837		2.03226	0.810567	0.701147		2.63793	1.61129	0.338879		2.36989	2.83876	2.1651
Ort.	76.705	1.748	29.7073	Ort.	59.2977	12.122	26.445	Ort.	65.6163	8.45733	29.9033		65.0363	9.29267	31.8467		68.119	7.70967	30.6		70.6237	6.58067	31.55		68.131	7.57333	34.44	Ort.	71.0053	5.19567	35.47	Ort.	73.9803	3.04	32.8657
SS	1.09696	0.633568	1.25394	SS	2.06617	0.416722	0.820715	SS	4.28931	0.901325	0.47329		0.806573	0.173477	0.478947		1.42883	0.77546	1.33407		3.52375	1.53018	2.20806		0.0494975	0.330926	0.467633	SS	2.39945	0.978164	1.06537	SS	0.958365	0.38938	0.459619
												Ort.	66.5777	8.50117	31.2233					Ort.	69.3773	7.077	32.995
												SS	0.44	0.425667	0.604667					SS	2.45667	0.848	1.23067

## Sheet: Lentil Crackers
Sample	Control				%4 Onion Skin Powder				%1 Onion Skin Powder				%0.27 Onion Skin extract				%0.27 Onion Skin extract				%0.075 Onion Skin extract				%0.075 Onion Skin extract				%0.1 Quercetin				%0.025 Quercetin
	Control-L				L.S2				L.S1				L.E2				L.E2				L.E1				L.E1				L.Q2				L.Q1
	L*	a*	b*		L*	a*	b*		L*	a*	b*		L*	a*	b*		L*	a*	b*		L*	a*	b*		L*	a*	b*		L*	a*	b*		L*	a*	b*
	66.18	17.01	45.15		55.72	17.43	33.23		60.06	16.49	39.61		61.72	17.44	41.07		64.24	17.86	40.15		62.33	17.41	42.17		66.83	17.86	43.95		67.13	17.72	45.48		64.7	16.66	43.02
	66.02	16.75	44.78		54.49	17.44	32.34		59.97	16.36	39.74		60.94	17.51	40.59		63.22	18.03	39.78		62.97	17.35	42.7		65.26	17.91	43.48		65.86	17.92	45.33		64.83	16.71	43.25
	66.31	17.35	45.85		54.67	17.59	32.66		62.33	16.18	40.18		60.08	16.62	39.05		63.42	17.5	39.21		63.84	17.69	43.15		63.73	17.66	42.29		67.15	18.35	46.44		63.08	16.76	42.59
	66.17	17.0367	45.26		54.96	17.4867	32.7433		60.7867	16.3433	39.8433		60.9133	17.19	40.2367		63.6267	17.7967	39.7133		63.0467	17.4833	42.6733		65.2733	17.81	43.24		66.7133	17.9967	45.75		64.2033	16.71	42.9533
	63.03	17.02	42.49		55.28	17.51	33.75		63.25	17.78	42.61		61.34	18.05	40.97		61.58	18.59	40.62		63.27	17.62	42.54		63.77	17.58	42.52		64.34	17.35	44.95		64.57	17.27	43.54
	64.91	17.98	45		56.4	17.04	33.63		63.12	17.88	42.09		60.73	17.56	40.25		61.91	18.29	40.51		63.05	17.21	42.42		63.65	17.63	42.27		67.69	17.87	46.6		65.44	17.26	43.77
	64.72	17.62	44.58		54.89	17.68	32.96		61.94	17.75	41.59		62	17.18	39.4		61.11	18.32	40.27		63.46	17.79	42.94		64.25	17.85	43.18		67.41	17.6	46.08		65.46	17.2	43.7
	64.22	17.54	44.0233		55.5233	17.41	33.4467		62.77	17.8033	42.0967		61.3567	17.5967	40.2067		61.5333	18.4	40.4667		63.26	17.54	42.6333		63.89	17.6867	42.6567		66.48	17.6067	45.8767		65.1567	17.2433	43.67
	65.79	17.33	45.5		54.79	17.25	33.15		62.09	17.27	40.49		59.65	17.67	40.76		61.19	18.25	38.77		63.75	17.56	43.51		65.19	18.31	43.67		67.07	17.68	46.5		64.99	17.88	44.17
	65.35	17.17	45.28		55.75	17.48	33.82		60.03	17.33	39.57		60.18	17.49	40.47		61.26	18.23	38.84		61.76	18	42.7		64.85	18.01	43.26		67.68	17.41	46.43		64.53	17.67	44.05
	65.94	17.3	45.46		54.95	17.43	33.57		62.35	17.36	41.56		60.82	17.66	40.95		61.08	19.06	40.26		63.09	18.15	43.11		64.86	18.26	43.52		67.66	17.68	46.94		67.4	18.04	45.25
	65.6933	17.2667	45.4133		55.1633	17.3867	33.5133		61.49	17.32	40.54		60.2167	17.6067	40.7267		61.1767	18.5133	39.29		62.8667	17.9033	43.1067		64.9667	18.1933	43.4833		67.47	17.59	46.6233		65.64	17.8633	44.49
	66.06	16.46	44.16		54.7	17.25	32.86		63.05	16.97	40.91		63.17	18.26	42.75		63.53	18.38	40.02		62.98	18.14	43.03		65.94	18.13	44.18		66.66	17.5	46.2		66.39	17.01	44.09
	65.6	17.19	44.96		54.87	17.08	32.84		62.83	17.25	41.98		62.16	18.14	42.57		61.51	17.87	39.47		62.99	18.31	43.27		63.76	18	43.04		66.86	17.16	45.63		66.33	16.87	44.07
	66.24	17.24	45.15		55.71	17.49	34.31		62.92	17.42	41.75		62.51	18.25	42.58		61.11	18.28	38.83		63.5	18.54	43.69		65.52	17.93	43.47		65.89	17.51	45.56		66.5	17.08	43.89
	65.9667	16.9633	44.7567		55.0933	17.2733	33.3367		62.9333	17.2133	41.5467		62.6133	18.2167	42.6333		62.05	18.1767	39.44		63.1567	18.33	43.33		65.0733	18.02	43.5633		66.47	17.39	45.7967		66.4067	16.9867	44.0167
	65.91	15.05	41.09		54.2	16.92	32.23		61.9	17.7	42.24		60.83	17.77	40.34		64.48	18.2	41.14		63.51	18.63	43.2		65.07	17.73	43.25		66.51	18	46		67	17.23	44.19
	63.33	16.19	41.64		53.87	17.48	32.37		62.05	17.38	41.64		61.32	17.59	41.07		64.1	17.98	40.56		62.56	18.34	43.72		64.37	17.56	42.7		66.29	18.01	45.94		65.85	17.12	44.13
	64.3	16.45	42.34		51.41	17	31.29		60.5	17.25	39.66		61.75	17.51	41.14		64.11	17.9	39.98		63.16	18.53	42.84		66.64	17.76	43.25		67.28	18.02	46.05		65.56	17.3	44.19
	64.5133	15.8967	41.69		53.16	17.1333	31.9633		61.4833	17.4433	41.18		61.3	17.6233	40.85		64.23	18.0267	40.56		63.0767	18.5	43.2533		65.36	17.6833	43.0667		66.6933	18.01	45.9967		66.1367	17.2167	44.17
Ort.	65.3127	16.9407	44.2287		54.78	17.338	33.0007		61.8927	17.2247	41.0413		61.28	17.6467	40.9307		62.5233	18.1827	39.894		63.0813	17.9513	42.9993		64.9127	17.8787	43.202		66.7653	17.7187	46.0087		65.5087	17.204	43.86
SS	0.886072	0.625528	1.51928		0.92931	0.13759	0.655156		0.922718	0.540517	0.876764		0.873095	0.366773	0.994109		1.33676	0.287203	0.586318		0.14569	0.456877	0.326194		0.592614	0.222893	0.362925		0.410207	0.273532	0.356102		0.872616	0.426526	0.586449
Sample	Control				%4 Onion Skin Powder				%1 Onion Skin Powder				%0.27 Onion Skin extract				%0.27 Onion Skin extract				%0.075 Onion Skin extract				%0.075 Onion Skin extract				%0.1 Quercetin				%0.025 Quercetin
	Control-L				L.S2				L.S1				L.E2				L.E2				L.E1				L.E1				L.Q2				L.Q1
	L*	a*	b*		L*	a*	b*		L*	a*	b*		L*	a*	b*		L*	a*	b*		L*	a*	b*		L*	a*	b*		L*	a*	b*		L*	a*	b*
	65.59	18.24	42.83		57.17	16.79	34.26		61.99	17.09	40.03		60	17.15	38.55		63.51	17.99	41.27		67.84	17.99	43.47		62.52	17.93	42.5		64.18	17.84	44.67		66.29	17.55	43.8
	65.58	18.25	42.95		56.75	16.77	34.28		62.7	16.82	40.11		61.14	18.01	39.94		63.46	18.22	41.45		63.34	16.89	40.68		61.46	18.56	42.4		63.39	17.45	44.15		66.37	17.25	43.3
	62.25	18.02	43.08		56.96	17	34.32		62.78	17.18	40.93		58.76	17.49	38.12		63.11	18.01	41.03		67.12	17.68	42.79		61.38	18.23	42.53		64.35	17.44	44.96		65.25	17.76	43.34
	64.4733	18.17	42.9533		56.96	16.8533	34.2867		62.49	17.03	40.3567		59.9667	17.55	38.87		63.36	18.0733	41.25		66.1	17.52	42.3133		61.7867	18.24	42.4767		63.9733	17.5767	44.5933		65.97	17.52	43.48
	62.63	16.96	40.51		57.81	16.86	35.57		62.83	17.36	40.66		57.44	16.42	37.75		61.44	17.89	41.09		67.37	18.04	42.36		63.41	27.4	42.55		62.19	27.47	44.42		63.31	16.89	42.76
	61.04	16.57	39.39		56.28	16.57	34.59		62.59	17.44	40.5		57.59	16.67	38.37		61.63	18.28	41.49		67.39	17.77	42.24		63.27	18.12	43.61		61.46	17.61	43.23		63.25	17.17	42.95
	63.33	16.95	41.19		57.4	17.44	34.6		62.72	17.34	40.76		58.37	16.97	39.1		60.45	17.94	40.72		68.39	17.68	42.78		64.35	17.86	43.79		59.88	16.74	41.6		63.44	17.31	43.29
	62.3333	16.8267	40.3633		57.1633	16.9567	34.92		62.7133	17.38	40.64		57.8	16.6867	38.4067		61.1733	18.0367	41.1		67.7167	17.83	42.46		63.6767	21.1267	43.3167		61.1767	20.6067	43.0833		63.3333	17.1233	43
	65.26	17.01	41i78		57.91	17.45	35.95		64.52	17.6	41.84		59.24	17.8	38.22		61.58	18.2	40.61		67.92	17.48	42.64		62.47	17.7	42.38		61.55	16.51	42.55		65.54	17.56	43.87
	63.94	17.77	41.9		57.7	17.24	35.42		64.31	18.06	42.7		59.27	18	38.43		62.37	17.95	41.11		68.82	17.61	43.44		60.63	28.03	42.69		61.98	18	44.44		64.78	17.02	43.22
	65.82	18.31	43.42		56.22	16.94	34.11		63.53	17.88	42.05		58.73	17.97	38.52		62.07	17.76	40.97		68.21	17.48	43.01		62.11	18.04	42.71		62.43	17.41	44.31		63.16	16.66	42.14
	65.0067	17.6967	42.66		57.2767	17.21	35.16		64.12	17.8467	42.1967		59.08	17.9233	38.39		62.0067	17.97	40.8967		68.3167	17.5233	43.03		61.7367	21.2567	42.5933		61.9867	17.3067	43.7667		64.4933	17.08	43.0767
	61.26	16.99	40.48		58.3	16.97	33.95		63.6	17.61	41.48		59.9	18.42	40.2		64.45	17.6	41.46		67.14	17.06	41.88		64.94	18.39	44.63		64.02	17.64	45.02		64.84	17.21	43.12
	59.05	16.69	39.3		57.34	16.63	33.94		63.03	17.53	40.59		59.09	18.1	39.4		63.39	17.88	41.27		67.93	17.76	42.63		64.24	18.58	44.35		64.13	17.56	45.09		65.02	17.26	43.35
	64.66	17.42	42.76		56.75	16.48	33.64		63.84	18	41.52		59.04	18.87	39.05		63.28	17.82	41.06		67.76	17.37	41.79		64.15	18.53	44.07		62.92	17.56	43.77		64.41	17.21	43.16
	61.6567	17.0333	40.8467		57.4633	16.6933	33.8433		63.49	17.7133	41.1967		59.3433	18.4633	39.55		63.7067	17.7667	41.2633		67.61	17.3967	42.1		64.4433	18.5	44.35		63.69	17.5867	44.6267		64.7567	17.2267	43.21
	64.46	17	41.85		55.49	17.13	33.48		63.56	17.96	41.38		60.81	17.98	39.76		61.52	18.23	41.6		68.77	17.49	43.26		62.9	17.91	42.86		62.39	17.97	44.51		64.95	17.64	43.24
	63.28	16.72	41		56.44	17.27	33.57		63.71	17.77	41.6		60.05	17.93	39.52		60.31	17.68	40.57		67.36	17.36	42.64		61.71	18.05	42.48		61.62	17.8	44.71		65.57	17.73	43.53
	63.87	17.2	41.98		56.48	17.26	33.74		64.05	17.84	41.98		60.05	17.98	39.49		61.87	18.18	41.7		68.05	17.5	43.53		62.71	18.17	42.37		61.23	17.92	44.66		65.08	17.47	43.1
	63.87	16.9733	41.61		56.1367	17.22	33.5967		63.7733	17.8567	41.6533		60.3033	17.9633	39.59		61.2333	18.03	41.29		68.06	17.45	43.1433		62.44	18.0433	42.57		61.7467	17.8967	44.6267		65.2	17.6133	43.29
Ort.	63.468	17.34	41.6867		57	16.9867	34.3613		63.3173	17.5653	41.2087		59.2987	17.7173	38.9613		62.296	17.9753	41.16		67.5607	17.544	42.6093		62.8167	19.4333	43.0613		62.5147	18.1947	44.1393		64.7507	17.3127	43.2113
SS	1.42374	0.571863	1.11966		0.515957	0.228607	0.672419		0.69486	0.35597	0.745537		0.968425	0.661389	0.588254		1.18273	0.122397	0.164789		0.863306	0.168332	0.45592		1.19946	1.61394	0.795004		1.24177	1.36443	0.695543		0.970021	0.24019	0.187862
Ort.	64.3903	17.1403	42.9577	Ort.	55.89	17.1623	33.681	Ort.	62.605	17.395	41.125		60.2893	17.682	39.946		62.4097	18.079	40.527		65.321	17.7477	42.8043		63.8647	18.656	43.1317	Ort.	64.64	17.9567	45.074	Ort.	65.1297	17.2583	43.5357
SS	1.30438	0.282371	1.79747	SS	1.56978	0.24843	0.962137	SS	1.00739	0.240888	0.118323		1.40101	0.0499689	1.39253		0.160749	0.146607	0.895197		3.16737	0.288028	0.275772		1.4821	1.09932	0.0994664	SS	3.00568	0.336583	1.32182	SS	0.535987	0.0768389	0.458677
												Ort.	61.3495	17.8805	40.2365					Ort.	64.5928	18.2018	42.968
												SS	0.877	0.0683333	0.351667					SS	1.19167	0.573667	0.124667

## Sheet: Özet Tablo
Wherat Crackers
	L*		a*		b*			∆E
Control	76.21	1.1	1.75	0.63	29.71	1.25
%1 Onion skin	65.6163	4.28931	8.45733	0.901325	29.9033	0.47329	157.251	12.54
%4 Onion skin	59.2977	2.06617	12.122	0.416722	26.445	0.820715	404.266	20.1064
%0.075 Phenolic ex.	69.3773	2.45667	7.077	0.848	32.995	1.23067	85.8535	9.26572
%0.25 Phenolic Extract	66.5777	0.44	8.50117	0.425667	31.2233	0.604667	140.65	11.8596
%0.025 Quercetin	73.9803	0.958365	3.04	0.38938	32.8657	0.459619	16.5937	4.07354
%0.1 Quercetin	71.0053	2.39945	5.19567	0.98	35.47	1.06537	72.1388	8.49345
Lentil Crackers
	L*		a*		b*			∆E
Control	64.3903	1.30438	17.1403	0.282371	42.9577	1.79747
%1 Onion skin	62.605	1.00739	17.395	0.240888	41.125	0.118323	6.61848	2.57264
%4 Onion skin	55.89	1.56978	17.1623	0.24843	33.681	0.962137	158.35	12.5837
%0.075 Phenolic ex.	64.5928	1.19167	18.2018	0.573667	42.968	0.124667	1.1687	1.08106
%0.25 Phenolic Extract	61.3495	0.877	17.8805	0.0683333	40.2365	0.351667	17.2104	4.14855
%0.025 Quercetin	65.1297	0.535987	17.2583	0.0768389	43.6978	0.458677	1.10551	1.05143
%0.1 Quercetin	64.64	3.00568	17.9567	0.336583	45.5413	1.32	7.39273	2.71896
