# Supplementary material for: Protein–phenolic interactions in lentil and wheat crackers with onion skin phenolics: effects of processing and in vitro gastrointestinal digestion
Source: Royal Society of Chemistry journal article supplement (doi:10.1039/d2fo02885a), 2023-01-01
Supplement: d2fo02885a2.xlsx [file d2fo02885a2.xlsx]

## Sheet: TFM
TPC: Iqbal, S., Haleem, S., Akhtar, M., Zia-ul-Haq, M., ve Akbar, J. (2008). Efficiency of pomegranate peel extracts in stabilization of sunflower oil under accelerated conditions, Food Research International, 41, (2), 194–200.
																		Concentration (mg/mL)	A1	A2	A3	Aort.			Concentration (mg/mL)	A1	A2	A3	Aort.
																	Control-W	0.148777	0.227	0.224	0.229	0.226667		Control-L	0.147448	0.316	0.346	0.351	0.337667
Gallic acid-grafic								Concentration (mg/mL)	A1	A2	A3	Aort.						0.149927	0.226	0.228	0.23	0.228			0.147669	0.335	0.342	0.396	0.357667
mg/mL				Ort.	SS		Onion skin 1	0.00396	0.512	0.52	0.567	0.533					Control-W	0.149177	0.214	0.212	0.217	0.214333		Control-L	0.149509	0.337	0.399	0.34	0.358667
0.05	0.165	0.155	0.146	0.155333	0.00950438			0.00396	0.573	0.534	0.522	0.543						0.148559	0.215	0.211	0.215	0.213667			0.148601	0.345	0.332	0.316	0.331
0.1	0.307	0.317	0.335	0.319667	0.0141892		Onion Skin 2	0.00439	0.646	0.642	0.651	0.646333					W.S2	0.14638	0.592	0.632	0.657	0.627		L.S2	0.14789	0.594	0.62	0.637	0.617
0.15	0.495	0.467	0.463	0.475	0.0174356			0.00439	0.619	0.655	0.625	0.633						0.145412	0.686	0.657	0.641	0.661333			0.148049	0.59	0.578	0.612	0.593333
0.2	0.659	0.637	0.627	0.641	0.0163707		Phenolic Ex. 1	0.00034	0.545	0.523	0.546	0.538					W.S2	0.145521	0.66	0.653	0.661	0.658		L.S2	0.148773	0.583	0.542	0.568	0.564333
0.25	0.748	0.799	0.765	0.770667	0.0259679			0.00034	0.55	0.524	0.571	0.548333						0.145799	0.655	0.677	0.627	0.653			0.148368	0.575	0.612	0.611	0.599333
0.3	0.936	0.938	0.901	0.925	0.0208087		Phenolic ex. 1	0.0002	0.427	0.337	0.346	0.37					W.S1	0.145823	0.414	0.467	0.399	0.426667		L.S1	0.148871	0.466	0.414	0.411	0.430333
								0.0002	0.346	0.414	0.33	0.363333						0.145847	0.39	0.408	0.4	0.399333			0.147571	0.451	0.437	0.438	0.442
							Phenolic ex. 2	0.00026	0.436	0.436	0.465	0.445667					W.S1	0.147494	0.397	0.384	0.385	0.388667		L.S1	0.149485	0.445	0.451	0.46	0.452
								0.00026	0.468	0.485	0.468	0.473667						0.145823	0.39	0.392	0.381	0.387667			0.147337	0.441	0.431	0.45	0.440667
							Phenolic Ex. 2	0.00025	0.399	0.407	0.418	0.408					W.E2	0.148644	0.607	0.591	0.577	0.591667		L.E2	0.148847	0.583	0.57	0.571	0.574667
								0.00025	0.406	0.407	0.424	0.412333						0.145424	0.557	0.58	0.579	0.572			0.147632	0.565	0.579	0.579	0.574333
							Quercetin	9e-05	0.385	0.368	0.387	0.38					W.E2	0.145484	0.6	0.583	0.62	0.601		L.E2	0.147865	0.604	0.608	0.609	0.607
								9e-05	0.413	0.396	0.395	0.401333						0.145436	0.557	0.58	0.579	0.572			0.148147	0.604	0.609	0.61	0.607667
							Quercetin	8e-05	0.325	0.334	0.341	0.333333					W.E2	0.146949	0.541	0.536	0.572	0.549667		L.E2	0.149239	0.552	0.597	0.56	0.569667
								8e-05	0.336	0.333	0.341	0.336667						0.145847	0.516	0.532	0.517	0.521667			0.147595	0.597	0.541	0.597	0.578333
																	W.E2	0.145109	0.459	0.492	0.501	0.484		L.E2	0.148025	0.535	0.532	0.553	0.54
																		0.147821	0.497	0.444	0.499	0.48			0.147804	0.536	0.544	0.545	0.541667
																	W.E1	0.146538	0.487	0.456	0.478	0.473667		L.E1	0.14854	0.426	0.472	0.449	0.449
																		0.14747	0.431	0.446	0.432	0.436333			0.148086	0.417	0.403	0.426	0.415333
																	W.E1	0.14868	0.346	0.423	0.348	0.372333		L.E1	0.148393	0.391	0.424	0.402	0.405667
																		0.148245	0.31	0.314	0.315	0.313			0.14773	0.39	0.415	0.396	0.400333
																	W.E1	0.146223	0.485	0.389	0.388	0.420667		L.E1	0.148331	0.402	0.433	0.429	0.421333
																		0.145557	0.392	0.369	0.394	0.385			0.148037	0.427	0.425	0.401	0.417667
Quercetin-grafic																	W.E1	0.151973	0.385	0.377	0.378	0.38		L.E1	0.147448	0.43	0.449	0.436	0.438333
Concentration (mg/ml)	Konsantrasyon mM	A1	A2	A3	Ort.	STDSAPMA												0.149552	0.367	0.394	0.382	0.381			0.148331	0.363	0.402	0.39	0.385
0.05	0.165431	0.285	0.307	0.26	0.284	0.023516											W.Q2	0.146792	0.48	0.544	0.563	0.529		L.Q2	0.147742	0.491	0.496	0.502	0.496333
0.1	0.330863	0.446	0.437	0.457	0.446667	0.0100167												0.145726	0.541	0.566	0.517	0.541333			0.148221	0.54	0.531	0.554	0.541667
0.15	0.496294	0.595	0.609	0.608	0.604	0.00781025											W.Q2	0.147494	0.53	0.52	0.532	0.527333		L.Q2	0.147546	0.579	0.528	0.541	0.549333
0.2	0.661726	0.754	0.76	0.753	0.755667	0.00378594												0.147797	0.503	0.521	0.516	0.513333			0.148417	0.508	0.549	0.542	0.533
0.25	0.827157	0.874	0.874	0.887	0.878333	0.00750555											W.Q1	0.148983	0.353	0.367	0.378	0.366		L.Q1	0.147313	0.474	0.502	0.497	0.491
0.3	0.992589	1.055	1.057	1.048	1.05333	0.00472582												0.14977	0.351	0.315	0.379	0.348333			0.149252	0.386	0.388	0.393	0.389
0.4	1.32345	1.274	1.33	1.334	1.31267	0.033546											W.Q1	0.146949	0.338	0.332	0.34	0.336667		L.Q1	0.150025	0.432	0.347	0.437	0.405333
0.5	1.65431	1.544	1.597	1.589	1.57667	0.0285715												0.148559	0.322	0.328	0.348	0.332667			0.149239	0.378	0.437	0.387	0.400667
								Concentration (mg/mL)	A1	A2	A3	Aort.
							Soğan Kabuğu 1	0.00396	0.512	0.52	0.567	0.533
								0.00396	0.573	0.534	0.522	0.543
							Soğan Kabuğu 2	0.00439	0.646	0.642	0.651	0.646333
								0.00439	0.619	0.655	0.625	0.633
							Soğan ekstraktı 1	0.00034	0.545	0.523	0.546	0.538
								0.00034	0.55	0.524	0.571	0.548333
							Soğan ekstraktı 1	0.0002	0.427	0.337	0.346	0.37
								0.0002	0.346	0.414	0.33	0.363333
							Soğan ekstraktı 2	0.00026	0.436	0.436	0.465	0.445667
								0.00026	0.468	0.485	0.468	0.473667
							Soğan ekstraktı 2	0.00025	0.399	0.407	0.418	0.408
								0.00025	0.406	0.407	0.424	0.412333
							Kuersetin	9e-05	0.385	0.368	0.387	0.38
								9e-05	0.413	0.396	0.395	0.401333
							Kuersetin	8e-05	0.325	0.334	0.341	0.333333
								8e-05	0.336	0.333	0.341	0.336667

## Sheet: DPPH
Referance: Kumaran & Karunakaran 2006																								mg/mL
0.1 M DPPH metanolde hazırlandı																								Concentration (mg/mL)	A1	A2	A3	Aort.	A kont.				Kons.	A1	A2	A3	Aort.	A kont.
2 ml DPPH + 100 mikrolitre ekstrakt eklendi.																							Control-W	0.148777	0.965	0.946	0.938	0.949667	1.09675			Control-L	0.147448	0.409	0.407	0.404	0.406667	1.10425
30 dakika bekletildi. 517 nm'de abs okundu. Metanol ile küvetler sıfırlandı.											Concentration (mg/mL)	A1	A2	A3	Aort.	A kont.								0.149927	0.94	0.937	0.937	0.938	1.09675				0.147669	0.4	0.411	0.401	0.404	1.10425
										Onion skin 1	0.00198	0.901	0.89	0.894	0.895	1.34							Control-W	0.149177	0.972	0.996	0.99	0.986	1.09675			Control-L	0.149509	0.392	0.398	0.402	0.397333	1.10425
1 mL'ye tamamla											0.00198	0.883	0.882	0.881	0.882	1.34								0.148559	0.981	0.988	0.972	0.980333	1.09675				0.148601	0.405	0.406	0.418	0.409667	1.10425
Konsantrasyon (mg/ml)	µM/mL	1	2	3	Akontrol	Aort	%AA			Onion Skin 2	0.002195	0.832	0.814	0.818	0.821333	1.34							W.S2	0.14638	0.195	0.182	0.205	0.194	1.077		1/2 sey.	L.S2	0.14789	0.407	0.424	0.448	0.426333	1.077
0.05	0.199768	1.141	1.147	1.145	1.392	1.14433	17.7921				0.002195	0.806	0.816	0.809	0.810333	1.34								0.145412	0.167	0.167	0.194	0.176	1.077				0.148049	0.402	0.437	0.384	0.407667	1.077
0.075	0.299652	1.022	1.028	1.023	1.392	1.02433	26.4128			Phenolic Ex. 1	0.00017	0.587	0.579		0.583	1.02125							W.S2	0.145521	0.211	0.201	0.18	0.197333	1.077		1/2 sey.	L.S2	0.148773	0.472	0.476	0.479	0.475667	1.077
0.1	0.399537	0.881	0.883	0.881	1.392	0.881667	36.6619				0.00034	0.201	0.232	0.192	0.208333	1.02125								0.145799	0.191	0.181	0.175	0.182333	1.077				0.148368	0.429	0.425	0.423	0.425667	1.077
0.125	0.499421	0.789	0.788	0.791	1.392	0.789333	43.295			Phenolic ex. 1	0.0002	0.534	0.555	0.547	0.545333	1.02125							W.S1	0.145823	0.693	0.701	0.708	0.700667	1.077		1/2 sey.	L.S1	0.148871	0.839	0.82	0.819	0.826	1.392
0.15	0.599305	0.651	0.659	0.657	1.392	0.655667	52.8975				0.0002	0.534	0.556	0.55	0.546667	1.02125								0.145847	0.693	0.703	0.695	0.697	1.077				0.147571	0.896	0.897	0.898	0.897	1.392
0.175	0.699189	0.542	0.566	0.558	1.392	0.555333	60.1054			Phenolic ex. 2	0.00026	0.391	0.392	0.398	0.393667	1.02125							W.S1	0.147494	0.702	0.684	0.708	0.698	1.077		1/2 sey.	L.S1	0.149485	0.88	0.894	0.826	0.866667	1.392
											0.00026	0.397	0.38	0.395	0.390667	1.02125								0.145823	0.713	0.701	0.695	0.703	1.077				0.147337	0.87	0.89	0.862	0.874	1.392
										Phenolic Ex. 2	0.00025	0.437	0.429	0.397	0.421	1.02125							W.E2	0.148644	0.307	0.283	0.284	0.291333	1.077		1/2 sey.	L.E2	0.148847	0.46	0.457	0.45	0.455667	1.077
											0.00025	0.412	0.402	0.385	0.399667	1.02125								0.145424	0.282	0.271	0.283	0.278667	1.077				0.147632	0.455	0.448	0.455	0.452667	1.077
										Quercetin	9e-05	0.469	0.454	0.471	0.464667	1.34							W.E2	0.145484	0.307	0.331	0.316	0.318	1.077		1/2 sey.	L.E2	0.147865	0.427	0.404	0.434	0.421667	1.077
											9e-05	0.451	0.463	0.456	0.456667	1.34								0.145436	0.291	0.281	0.31	0.294	1.077				0.148147	0.45	0.446	0.448	0.448	1.077
										Quercetin	8e-05	0.559	0.542	0.573	0.558	1.34							W.E2	0.146949	0.367	0.367	0.331	0.355	1.077		1/2 sey.	L.E2	0.149239	0.45	0.412	0.429	0.430333	1.077
											8e-05	0.551	0.559	0.567	0.559	1.34								0.145847	0.365	0.348	0.346	0.353	1.077				0.147595	0.453	0.494	0.448	0.465	1.077
																							W.E2	0.145109	0.392	0.368	0.377	0.379	1.077		1/2 sey.	L.E2	0.148025	0.46	0.456	0.435	0.450333	1.077
																								0.147821	0.389	0.382	0.381	0.384	1.077				0.147804	0.481	0.476	0.495	0.484	1.077
																							W.E1	0.146538	0.647	0.657	0.643	0.649	1.09675		1/2 sey.	L.E1	0.14854	0.873	0.864	0.897	0.878	1.392
																								0.14747	0.693	0.71	0.704	0.702333	1.09675				0.148086	0.89	0.894	0.89	0.891333	1.392
																							W.E1	0.14868	0.749	0.772	0.772	0.764333	1.09675		1/2 sey.	L.E1	0.148393	0.86	0.826	0.814	0.833333	1.392
																								0.148245	0.705	0.699	0.706	0.703333	1.09675				0.14773	0.837	0.828	0.826	0.830333	1.392
																							W.E1	0.146223	0.713	0.703	0.7	0.705333	1.09675		1/2 sey.	L.E1	0.148331	0.877	0.879	0.876	0.877333	1.392
																								0.145557	0.713	0.714	0.709	0.712	1.09675				0.148037	0.871	0.858	0.861	0.863333	1.392
1 mL'ye tamamla																							W.E1	0.151973	0.715	0.717	0.724	0.718667	1.09675		1/2 sey.	L.E1	0.147448	0.891	0.865	0.859	0.871667	1.392
Konsantrasyon (mg/ml)	µM/mL	1	2	3	Akontrol	Aort	%AA																	0.149552	0.697	0.705	0.709	0.703667	1.09675				0.148331	0.866	0.852	0.856	0.858	1.392
0.025	0.0998841	0.992	0.962	0.971	1.077	0.975	9.47075																W.Q2	0.146792	0.306	0.285	0.29	0.293667	1.077		1/2 sey.	L.Q2	0.147742	0.53	0.565	0.539	0.544667	1.077
0.05	0.199768	0.894	0.906	0.911	1.09825	0.903667	17.7176																	0.145726	0.297	0.283	0.277	0.285667	1.077				0.148221	0.495	0.465	0.495	0.485	1.077
0.075	0.299652	0.761	0.738	0.73	1.077	0.743	31.0121																W.Q2	0.147494	0.309	0.302	0.296	0.302333	1.077		1/2 sey.	L.Q2	0.147546	0.487	0.481	0.475	0.481	1.077
0.1	0.399537	0.654	0.655	0.664	1.09825	0.657667	40.1169																	0.147797	0.323	0.314	0.308	0.315	1.077				0.148417	0.548	0.554	0.523	0.541667	1.077
0.125	0.499421	0.567	0.521	0.521	1.077	0.536333	50.2012																W.Q1	0.148983	0.737	0.73	0.736	0.734333	1.09675		1/2 sey.	L.Q1	0.147313	0.872	0.858	0.852	0.860667	1.392
0.15	0.599305	0.414	0.428	0.417	1.09825	0.419667	61.7877																	0.14977	0.74	0.734	0.739	0.737667	1.09675				0.149252	0.872	0.855	0.853	0.86	1.392
0.2	0.799073	0.185	0.203	0.558	1.09825	0.315333	71.2877																W.Q1	0.146949	0.748	0.744	0.736	0.742667	1.09675		1/2 sey.	L.Q1	0.150025	0.897	0.853	0.86	0.87	1.392
																								0.148559	0.777	0.771	0.758	0.768667	1.09675				0.149239	0.873	0.898	0.869	0.88	1.392

## Sheet: CUPRAC
Apak, R., Güçlü, K., Özyürek, M., ve Karademir, S.E. (2004). Novel Total Antioxidant Capacity Index for Dietary Polyphenols and Vitamins C and E, Using Their Cupric Ion Reducing Capability in the Presence of Neocuproine: CUPRAC Method, Journal of Agricultural and Food Chemistry, 52, (26), 7970–7981.
0.1 mL örnek+1 mL CuCl2 (10-2 M)+ 1 mL neocuproin (7.5 mM)+ 1 mL NH4Ac (1 M, pH 7)+ 1 mL of water= 30 dk bekleme= 450 nm'de kontrole karşı okuma																			mg/mL
																			Kons.	A1	A2	A3	Aort.			Kons.	A1	A2	A3	Aort.
Troloks Standart eğrisi									Concentration (mg/mL)	A1	A2	A3	Aort.					Control-W	0.148777	0.149	0.143	0.142	0.144667		Control-L	0.147448	0.415	0.402	0.403	0.406667
0,005 g/5mL	0.001	g/mL	1 mg/mL					Onion skin 1	0.00396	0.47	0.519	0.519	0.502667						0.149927	0.139	0.139	0.137	0.138333			0.147669	0.438	0.42	0.42	0.426
									0.00396	0.52	0.539	0.515	0.524667					Control-W	0.149177	0.146	0.159	0.154	0.153		Control-L	0.149509	0.407	0.416	0.41	0.411
1 mL'ye tamamla	mg/ml	µM/mL	1	2	3	Ort.		Onion Skin 2	0.00439	0.593	0.599	0.6	0.597333						0.148559	0.132	0.137	0.133	0.134			0.148601	0.365	0.387	0.414	0.388667
0.1	0.1	0.399537	0.147	0.154	0.14	0.147			0.00439	0.595	0.597	0.597	0.596333					W.S2	0.14638	0.727	0.759	0.752	0.746		L.S2	0.14789	0.878	0.927	0.911	0.905333
0.2	0.2	0.799073	0.289	0.29	0.281	0.286667		Phenolic Ex. 1	0.00034	0.497	0.515	0.497	0.503						0.145412	0.762	0.789	0.783	0.778			0.148049	0.905	0.88	0.911	0.898667
0.3	0.3	1.19861	0.452	0.464	0.446	0.454			0.00034	0.496	0.519	0.499	0.504667					W.S2	0.145521	0.71	0.716	0.7	0.708667		L.S2	0.148773	0.848	0.894	0.883	0.875
0.4	0.4	1.59815	0.6	0.601	0.611	0.604		Phenolic ex. 1	0.0002	0.25	0.289	0.289	0.276						0.145799	0.718	0.742	0.727	0.729			0.148368	0.854	0.88	0.884	0.872667
0.5	0.5	1.99768	0.781	0.791	0.774	0.782			0.0002	0.278	0.282	0.283	0.281					W.S1	0.145823	0.323	0.326	0.331	0.326667		L.S1	0.148871	0.572	0.535	0.536	0.547667
								Phenolic ex. 2	0.00026	0.352	0.387	0.385	0.374667						0.145847	0.322	0.335	0.348	0.335			0.147571	0.574	0.576	0.557	0.569
									0.00026	0.376	0.373	0.364	0.371					W.S1	0.147494	0.344	0.351	0.342	0.345667		L.S1	0.149485	0.575	0.575	0.622	0.590667
								Phenolic Ex. 2	0.00025	0.351	0.347	0.363	0.353667						0.145823	0.346	0.349	0.347	0.347333			0.147337	0.61	0.614	0.6	0.608
									0.00025	0.37	0.366	0.365	0.367					W.E2	0.148644	0.632	0.66	0.621	0.637667		L.E2	0.148847	0.787	0.827	0.846	0.82
								Quercetin	9e-05	0.645	0.644	0.655	0.648						0.145424	0.666	0.646	0.621	0.644333			0.147632	0.793	0.832	0.805	0.81
									9e-05	0.656	0.652	0.659	0.655667					W.E2	0.145484	0.619	0.652	0.616	0.629		L.E2	0.147865	0.835	0.882	0.886	0.867667
								Quercetin	8e-05	0.58	0.593	0.57	0.581						0.145436	0.572	0.579	0.589	0.58			0.148147	0.819	0.81	0.821	0.816667
									8e-05	0.585	0.579	0.573	0.579					W.E2	0.146949	0.524	0.542	0.532	0.532667		L.E2	0.149239	0.726	0.746	0.731	0.734333
																			0.145847	0.54	0.511	0.524	0.525			0.147595	0.749	0.75	0.784	0.761
																		W.E2	0.145109	0.548	0.56	0.56	0.556		L.E2	0.148025	0.728	0.763	0.766	0.752333
																			0.147821	0.547	0.555	0.542	0.548			0.147804	0.754	0.784	0.749	0.762333
																		W.E1	0.146538	0.308	0.308	0.302	0.306		L.E1	0.14854	0.603	0.617	0.616	0.612
																			0.14747	0.307	0.305	0.305	0.305667			0.148086	0.607	0.6	0.591	0.599333
																		W.E1	0.14868	0.305	0.306	0.305	0.305333		L.E1	0.148393	0.519	0.54	0.516	0.525
																			0.148245	0.292	0.25	0.31	0.284			0.14773	0.508	0.52	0.514	0.514
																		W.E1	0.146223	0.302	0.305	0.3	0.302333		L.E1	0.148331	0.536	0.565	0.55	0.550333
																			0.145557	0.289	0.303	0.302	0.298			0.148037	0.572	0.556	0.558	0.562
																		W.E1	0.151973	0.307	0.323	0.312	0.314		L.E1	0.147448	0.605	0.627	0.606	0.612667
																			0.149552	0.306	0.327	0.311	0.314667			0.148331	0.46	0.499	0.515	0.491333
																		W.Q2	0.146792	0.571	0.555	0.582	0.569333		L.Q2	0.147742	0.648	0.701	0.676	0.675
																			0.145726	0.66	0.691	0.697	0.682667			0.148221	0.744	0.783	0.763	0.763333
																		W.Q2	0.147494	0.647	0.614	0.625	0.628667		L.Q2	0.147546	0.812	0.808	0.79	0.803333
																			0.147797	0.548	0.606	0.569	0.574333			0.148417	0.684	0.731	0.731	0.715333
																		W.Q1	0.148983	0.299	0.319	0.3	0.306		L.Q1	0.147313	0.595	0.484	0.59	0.556333
																			0.14977	0.311	0.299	0.285	0.298333			0.149252	0.492	0.499	0.489	0.493333
																		W.Q1	0.146949	0.281	0.29	0.285	0.285333		L.Q1	0.150025	0.526	0.522	0.535	0.527667
																			0.148559	0.259	0.261	0.256	0.258667			0.149239	0.519	0.526	0.512	0.519
