# Supplementary material for: Protein–phenolic interactions in lentil and wheat crackers with onion skin phenolics: effects of processing and in vitro gastrointestinal digestion
Source: Royal Society of Chemistry journal article supplement (doi:10.1039/d2fo02885a), 2023-01-01
Supplement: d2fo02885a3.xlsx [file d2fo02885a3.xlsx]

## Sheet: TPC
Digestion: Minekus, M., Alminger, M., Alvito, P., Ballance, S., Bohn, T., Bourlieu, C., Carriere, F., Boutrou, R., Corredig, M., Dupont, D., Dufour, C., Egger, L., Golding, M., Karakaya, S., Kirkhus, B., Le Feunteun, S., Lesmes, U., Macierzanka, A., Mackie, A., Marze, S., McClements, D.J., Menard, O., Recio, I., Santos, C.N., Singh, R.P., Vegarud, G.E., Wickham, M.S.J., Weitschies, W., ve Brodkor…
TPC: Iqbal, S., Haleem, S., Akhtar, M., Zia-ul-Haq, M., ve Akbar, J. (2008). Efficiency of pomegranate peel extracts in stabilization of sunflower oil under accelerated conditions, Food Research International, 41, (2), 194–200.
								Oral							Gastric							Intestinal
										Mercimek örnekleri 1/2 seyreltildi.							9 ve sonrası 1/2 seyreltidi							1 ve 7 seyreltilmedi, kalanı 1/2 seyreltildi.
													Ort.							Ort.							Ort.
Calibration grafic of Gallic acid								1	C	0.091	0.093	0.092	0.092		1	C	0.253	0.264	0.266	0.261		1	C	0.308	0.304	0.225	0.279
mg/mL				Ort.	SS			2		0.096	0.092	0.094	0.093		2		0.24	0.212	0.232	0.2445		2		0.305	0.236	0.296	0.279
0.05	0.165	0.155	0.146	0.155333	0.00950438								0.0925							0.25275							0.279
0.1	0.307	0.317	0.335	0.319667	0.0141892			3	SK	0.606	0.62	0.615	0.613667		3	SK	0.496	0.521	0.493	0.503333		3	SK	0.421	0.431	0.421	0.424333
0.15	0.495	0.467	0.463	0.475	0.0174356			4		0.601	0.591	0.625	0.605667		4		0.499	0.533	0.489	0.507		4		0.428	0.422	0.427	0.425667
0.2	0.659	0.637	0.627	0.641	0.0163707
0.25	0.748	0.799	0.765	0.770667	0.0259679			5	SE	0.548	0.559	0.564	0.557		5	SE	0.443	0.451	0.444	0.446		5	SE	0.308	0.298	0.306	0.304
0.3	0.936	0.938	0.901	0.925	0.0208087			6		0.581	0.553	0.566	0.566667		6		0.443	0.46	0.463	0.455333		6		0.307	0.304	0.302	0.304333
								7	Q	0.104	0.102	0.107	0.104333		7	Q	0.321	0.329	0.323	0.324333		7	Q	0.334	0.342	0.335	0.337
								8		0.105	0.103	0.105	0.104333		8		0.332	0.325	0.32	0.325667		8		0.335	0.333	0.338	0.335333
								9	B+SK	0.625	0.6	0.681	0.635333		9	B+SK	0.43	0.449	0.429	0.436		9	B+SK	0.51	0.514	0.508	0.510667
								10		0.684	0.68	0.673	0.679		10		0.497	0.405	0.524	0.475333		10		0.52	0.532	0.517	0.523
								11	B+SE	0.634	0.666	0.675	0.658333		11	B+SE	0.504	0.518	0.503	0.508333		11	B+SE	0.516	0.519	0.496	0.510333
								12		0.641	0.676	0.657	0.658		12		0.508	0.512	0.502	0.507333		12		0.51	0.514	0.514	0.512667
								13	B+Q	0.544	0.554	0.542	0.546667		13	B+Q	0.414	0.436	0.456	0.435333		13	B+Q	0.453	0.467	0.462	0.460667
								14		0.533	0.565	0.561	0.553		14		0.415	0.398	0.408	0.407		14		0.46	0.464	0.456	0.46
								15	M+SK	0.685	0.71	0.666	0.687		15	M+SK	0.596	0.618	0.614	0.609333		15	M+SK	0.578	0.561	0.568	0.569
								16		0.707	0.705	0.687	0.699667		16		0.614	0.615	0.609	0.612667		16		0.578	0.573	0.565	0.572
Calibration graphic of quercetin
Konsantrasyon (mg/ml)	Konsantrasyon mM	A1	A2	A3	Ort.	STDSAPMA		17	M+SE	0.732	0.781	0.739	0.750667		17	M+SE	0.501	0.507	0.505	0.504333		17	M+SE	0.46	0.481	0.482	0.474333
0.05	0.165431	0.285	0.307	0.26	0.284	0.023516		18		0.756	0.733	0.744	0.744333		18		0.504	0.509	0.501	0.504667		18		0.468	0.458	0.462	0.462667
0.1	0.330863	0.446	0.437	0.457	0.446667	0.0100167
0.15	0.496294	0.595	0.609	0.608	0.604	0.00781025		19	M+Q	0.751	0.749	0.761	0.753667		19	M+Q	0.623	0.609	0.633	0.621667		19	M+Q	0.724	0.697	0.734	0.718333
0.2	0.661726	0.754	0.76	0.753	0.755667	0.00378594		20		0.749	0.738	0.765	0.750667		20		0.647	0.641	0.641	0.643		20		0.724	0.723	0.727	0.724667
0.25	0.827157	0.874	0.874	0.887	0.878333	0.00750555
0.3	0.992589	1.055	1.057	1.048	1.05333	0.00472582		21	B-0	0.523	0.53	0.518	0.523667		21	B-0	0.531	0.522	0.532	0.528333		21	B-0	0.451	0.415	0.4	0.422
0.4	1.32345	1.274	1.33	1.334	1.31267	0.033546		22		0.508	0.534	0.525	0.522333		22		0.533	0.482	0.496	0.503667		22		0.427	0.411	0.417	0.418333
0.5	1.65431	1.544	1.597	1.589	1.57667	0.0285715
								23	B-2	0.843	0.905	0.853	0.867		23	B-2	0.503	0.52	0.525	0.516		23	B-2	0.44	0.444	0.425	0.436333
								24		0.802	0.862	0.787	0.817		24		0.514	0.508	0.51	0.510667		24		0.433	0.417	0.428	0.426
								25	B-3	0.859	0.844	0.853	0.852		25	B-3	0.51	0.505	0.536	0.517		25	B-3	0.41	0.446	0.45	0.435333
								26		0.847	0.859	0.871	0.859		26		0.514	0.521	0.536	0.523667		26		0.448	0.448	0.439	0.445
								27	B-6	0.854	0.851	0.861	0.855333		27	B-6	0.583	0.571	0.579	0.577667		27	B-6	0.43	0.433	0.422	0.428333
								28		0.872	0.868	0.84	0.86		28		0.566	0.565	0.567	0.566		28		0.422	0.427	0.428	0.425667
								29	B-8	0.766	0.814	0.806	0.795333		29	B-8	0.543	0.538	0.55	0.543667		29	B-8	0.444	0.457	0.453	0.451333
								30		0.802	0.773	0.754	0.776333		30		0.528	0.547	0.548	0.541		30		0.456	0.443	0.454	0.451
								31	B-14	0.66	0.636	0.616	0.637333		31	B-14	0.49	0.491	0.485	0.488667		31	B-14	0.421	0.437	0.426	0.428
								32		0.635	0.623	0.636	0.631333		32		0.484	0.481	0.474	0.479667		32		0.435	0.439	0.449	0.441
								33	B-15	0.683	0.676	0.652	0.670333		33	B-15	0.518	0.518	0.529	0.521667		33	B-15	0.442	0.44	0.449	0.443667
								34		0.674	0.688	0.654	0.672		34		0.52	0.523	0.515	0.519333		34		0.449	0.446	0.45	0.448333
								35	M-0	0.666	0.64	0.669	0.658333		35	M-0	0.528	0.542	0.535	0.535		35	M-0	0.529	0.54	0.545	0.538
								36		0.669	0.666	0.679	0.671333		36		0.539	0.544	0.527	0.536667		36		0.553	0.54	0.535	0.542667
								37	M-2	0.727	0.707	0.705	0.713		37	M-2	0.573	0.585	0.591	0.583		37	M-2	0.45	0.453	0.448	0.450333
								38		0.726	0.775	0.705	0.735333		38		0.595	0.592	0.573	0.586667		38		0.459	0.456	0.443	0.452667
								39	M-3	0.691	0.658	0.698	0.682333		39	M-3	0.554	0.559	0.569	0.560667		39	M-3	0.444	0.456	0.452	0.450667
								40		0.714	0.682	0.696	0.697333		40		0.568	0.564	0.564	0.565333		40		0.453	0.443	0.454	0.45
								41	M-6	0.715	0.641	0.736	0.697333		41	M-6	0.54	0.553	0.555	0.549333		41	M-6	0.507	0.512	0.526	0.515
								42		0.642	0.647	0.73	0.673		42		0.543	0.553	0.548	0.548		42		0.509	0.514	0.511	0.511333
								43	M-8	0.69	0.707	0.706	0.701		43	M-8	0.575	0.583	0.587	0.581667		43	M-8	0.488	0.49	0.485	0.487667
								44		0.768	0.766	0.71	0.748		44		0.592	0.59	0.584	0.588667		44		0.489	0.49	0.485	0.488
								45	M-14	0.696	0.649	0.685	0.676667		45	M-14	0.581	0.577	0.576	0.578		45	M-14	0.488	0.49	0.485	0.487667
								46		0.705	0.728	0.71	0.714333		46		0.579	0.58	0.578	0.579		46		0.488	0.477	0.438	0.467667
								47	M-15	0.702	0.68	0.709	0.697		47	M-15	0.536	0.518	0.513	0.522333		47	M-15	0.504	0.498	0.482	0.494667
								48		0.689	0.695	0.709	0.697667		48		0.525	0.502	0.516	0.514333		48		0.485	0.49	0.491	0.488667

## Sheet: Bakır İyonları
Apak, R., Güçlü, K., Özyürek, M., ve Karademir, S.E. (2004). Novel Total Antioxidant Capacity Index for Dietary Polyphenols and Vitamins C and E, Using Their Cupric Ion Reducing Capability in the Presence of Neocuproine: CUPRAC Method, Journal of Agricultural and Food Chemistry, 52, (26), 7970–7981.
0.1 mL örnek+1 mL CuCl2 (10-2 M)+ 1 mL neocuproin (7.5 mM)+ 1 mL NH4Ac (1 M, pH 7)+ 1 mL of water= 30 dk bekleme= 450 nm'de kontrole karşı okuma
Troloks Standart eğrisi										M14 ve M15 seyreltilmedi.
0,005 g/5mL	0.001	g/mL	1 mg/mL					Oral		SK ve SE 1/2 seyreltildi.					Gastric							Intestinal
mg/ml	µM/mL			Ort.						Mercimek örnekleri 1/3 seyreltildi.							9 ve sonrası 1/2 seyreltidi							1-7 seyreltilmedi, kalanı 1/2 seyreltildi.
0.1	0.399537	0.147	0.154	0.14	0.147								Ort.							Ort.							Ort.
0.2	0.799073	0.289	0.29	0.281	0.286667			1	C	0.005	0.006	0.002	0.00433333		1	C	0	0	0	0		1	C	0.017	0.024	0.013	0.018
0.3	1.19861	0.452	0.464	0.446	0.454			2		0	0	0.001	0.000333333		2		0	0	0	0		2		0.012	0.019	0.019	0.0166667
0.4	1.59815	0.6	0.601	0.611	0.604								0.00233333							0							0.0173333
0.5	1.99768	0.781	0.791	0.774	0.782			3	SK	0.743	0.692	0.752	0.729		3	SK	0.443	0.451	0.424	0.439333		3	SK	0.527	0.52	0.506	0.517667
								4		0.748	0.724	0.737	0.736333		4		0.415	0.428	0.408	0.417		4		0.524	0.523	0.502	0.516333
								5	SE	0.699	0.671	0.724	0.698		5	SE	0.46	0.452	0.464	0.458667		5	SE	0.296	0.309	0.3	0.301667
								6		0.711	0.647	0.728	0.695333		6		0.473	0.454	0.444	0.457		6		0.301	0.303	0.302	0.302
								7	Q	0.005	0.004	0.004	0.00433333		7	Q	0.235	0.238	0.19	0.221		7	Q	0.122	0.125	0.121	0.122667
								8		0.004	0.004	0.005	0.00433333		8		0.247	0.221	0.197	0.221667		8		0.124	0.123	0.122	0.123
								9	B+SK	0.288	0.261	0.294	0.281		9	B+SK	0.238	0.268	0.268	0.258		9	B+SK	0.216	0.232	0.237	0.228333
								10		0.233	0.242	0.225	0.233333		10		0.236	0.221	0.225	0.227333		10		0.249	0.246	0.242	0.245667
								11	B+SE	0.125	0.139	0.13	0.131333		11	B+SE	0.277	0.26	0.263	0.266667		11	B+SE	0.186	0.194	0.191	0.190333
								12		0.128	0.129	0.118	0.125		12		0.236	0.257	0.229	0.240667		12		0.19	0.179	0.19	0.186333
								13	B+Q	0.001	0.002	0.001	0.00133333		13	B+Q	0.236	0.227	0.229	0.230667		13	B+Q	0.147	0.163	0.154	0.154667
								14		0.001	0.002	0.002	0.00166667		14		0.243	0.264	0.255	0.254		14		0.15	0.152	0.152	0.151333
								15	M+SK	0.516	0.5	0.47	0.495333		15	M+SK	0.488	0.508	0.517	0.504333		15	M+SK	0.321	0.349	0.338	0.336
								16		0.497	0.509	0.492	0.499333		16		0.515	0.523	0.519	0.519		16		0.339	0.344	0.329	0.337333
								17	M+SE	0.56	0.569	0.544	0.557667		17	M+SE	0.485	0.476	0.481	0.480667		17	M+SE	0.234	0.253	0.23	0.239
								18		0.569	0.575	0.57	0.571333		18		0.473	0.486	0.48	0.479667		18		0.247	0.247	0.235	0.243
								19	M+Q	0.415	0.407	0.369	0.397		19	M+Q	0.549	0.55	0.554	0.551		19	M+Q	0.367	0.38	0.377	0.374667
								20		0.384	0.374	0.372	0.376667		20		0.563	0.564	0.557	0.561333		20		0.384	0.382	0.372	0.379333
								21	B-0	0.19	0.198	0.196	0.194667		21	B-0	0.252	0.269	0.294	0.271667	sey.yok	21	B-0	0.138	0.155	0.158	0.150333
								22		0.197	0.192	0.197	0.195333		22		0.272	0.285	0.266	0.274333		22		0.138	0.139	0.144	0.140333
								23	B-2	0.297	0.291	0.284	0.290667		23	B-2	0.314	0.326	0.304	0.314667		23	B-2	0.186	0.201	0.187	0.191333
								24		0.274	0.271	0.272	0.272333		24		0.343	0.348	0.311	0.334		24		0.207	0.208	0.217	0.210667
								25	B-3	0.272	0.285	0.279	0.278667		25	B-3	0.325	0.327	0.324	0.325333		25	B-3	0.206	0.205	0.194	0.201667
								26		0.228	0.253	0.257	0.246		26		0.323	0.324	0.326	0.324333		26		0.199	0.187	0.178	0.188
								27	B-6	0.211	0.232	0.227	0.223333		27	B-6	0.337	0.34	0.344	0.340333		27	B-6	0.174	0.154	0.169	0.165667
								28		0.225	0.232	0.212	0.223		28		0.322	0.324	0.324	0.323333		28		0.172	0.165	0.165	0.167333
								29	B-8	0.222	0.236	0.225	0.227667		29	B-8	0.317	0.306	0.367	0.33		29	B-8	0.164	0.169	0.163	0.165333
								30		0.23	0.232	0.229	0.230333		30		0.311	0.353	0.328	0.330667		30		0.153	0.167	0.167	0.162333
								31	B-14	0.165	0.165	0.15	0.16		31	B-14	0.231	0.283	0.214	0.242667		31	B-14	0.152	0.136	0.137	0.141667
								32		0.157	0.165	0.167	0.163		32		0.201	0.228	0.231	0.22		32		0.136	0.142	0.13	0.136
								33	B-15	0.132	0.147	0.152	0.143667		33	B-15	0.216	0.209	0.217	0.214		33	B-15	0.15	0.157	0.15	0.152333
								34		0.144	0.143	0.135	0.140667		34		0.201	0.228	0.231	0.22		34		0.14	0.152	0.148	0.146667
								35	M-0	0.377	0.375	0.401	0.384333		35	M-0	0.433	0.439	0.41	0.427333		35	M-0	0.228	0.219	0.224	0.223667
								36		0.386	0.358	0.406	0.383333		36		0.447	0.471	0.436	0.451333		36		0.229	0.225	0.227	0.227
								37	M-2	0.438	0.447	0.477	0.454		37	M-2	0.457	0.447	0.41	0.438		37	M-2	0.24	0.248	0.24	0.242667
								38		0.442	0.437	0.457	0.445333		38		0.434	0.496	0.478	0.469333		38		0.243	0.237	0.225	0.235
								39	M-3	0.461	0.486	0.467	0.471333		39	M-3	0.471	0.438	0.442	0.450333		39	M-3	0.223	0.224	0.243	0.23
								40		0.471	0.481	0.487	0.479667		40		0.416	0.429	0.436	0.427		40		0.253	0.234	0.229	0.238667
								41	M-6	0.377	0.388	0.349	0.371333		41	M-6	0.399	0.411	0.457	0.422333		41	M-6	0.229	0.223	0.234	0.228667
								42		0.375	0.397	0.376	0.382667		42		0.418	0.449	0.474	0.447		42		0.235	0.246	0.229	0.236667
								43	M-8	0.394	0.385	0.396	0.391667		43	M-8	0.438	0.47	0.484	0.464		43	M-8	0.238	0.245	0.233	0.238667
								44		0.391	0.379	0.384	0.384667		44		0.451	0.446	0.44	0.445667		44		0.255	0.264	0.247	0.255333
								45	M-14	0.407	0.401	0.409	0.405667		45	M-14	0.418	0.42	0.424	0.420667		45	M-14	0.205	0.206	0.205	0.205333
								46		0.37	0.405	0.397	0.390667		46		0.415	0.427	0.426	0.422667		46		0.206	0.201	0.202	0.203
								47	M-15	0.404	0.409	0.396	0.403		47	M-15	0.428	0.415	0.417	0.42		47	M-15	0.204	0.204	0.208	0.205333
								48		0.449	0.372	0.402	0.407667		48		0.424	0.434	0.408	0.422		48		0.201	0.207	0.205	0.204333
																						1/2 seyreltme
																						3	SK	0.308	0.324	0.318	0.290667
																						4		0.326	0.341	0.309	0.299333
																						5	SE	0.165	0.16	0.158	0.135
																						6		0.173	0.151	0.16	0.135333
																						7	Q	0.081	0.09	0.089	0.0606667
																						8		0.082	0.076	0.086	0.0553333

## Sheet: Protein-Bradford
Bradford Metodu: Bradford, M.M. (1976). A rapid and sensitive method for the quantitation of microgram quantities of protein utilizing the principle of protein-dye binding, Analytical Biochemistry, 72, (1–2), 248–254.
100 µL örnek+1 mL protein reaktifi çözeltisi= 595 nm'de kontrol örneğe karşı okuma
Calibration graph of BSA			1 mg/mL					Oral						Gastric						Intestinal
mg/mL				Ort.						1/4 seyreltildi.						1/2 seyreltidi						örnekler iki kat konsantrasyonda; 19: 1/2 seyreltildi.
					SS							Ort.						Ort.						Ort.
0.05	0.078	0.087	0.088	0.0843333				1	C	0.095	0.085	0.09		1	C	0.19	0.194	0.192		1	C	0.277	0.293	0.285
0.1	0.162	0.159	0.17	0.163667	0.00568624			2		0.089	0.089	0.089		2		0.193	0.195	0.194		2		0.287	0.292	0.2895
0.2	0.287	0.272	0.289	0.282667	0.00929157							0.0895						0.193						0.28725
0.3	0.411	0.4	0.393	0.401333	0.00907377			3	SK	0.135	0.144	0.1395		3	SK	0.166	0.166	0.166		3	SK	0.357	0.376	0.3665
0.4	0.526	0.52	0.516	0.520667	0.00503322			4		0.135	0.139	0.137		4		0.179	0.181	0.18		4		0.375	0.367	0.371
0.5	0.628	0.646	0.644	0.639333	0.00986577							0.13825						0.173						0.36875
0.6	0.732	0.735	0.73	0.732333	0.00251661			5	SE	0.121	0.143	0.132		5	SE	0.181	0.18	0.1805		5	SE	0.334	0.348	0.341
								6		0.141	0.114	0.1275		6		0.174	0.169	0.1715		6		0.349	0.344	0.3465
												0.12975						0.176						0.34375
								7	Q	0.1	0.106	0.103		7	Q	0.212	0.214	0.213		7	Q	0.305	0.316	0.3105
								8		0.107	0.1	0.1035		8		0.215	0.191	0.203		8		0.311	0.325	0.318
												0.10325						0.208						0.31425
								9	B+SK	0.148	0.163	0.1555		9	B+SK	0.148	0.144	0.146		9	B+SK	0.284	0.292	0.288
								10		0.17	0.152	0.161		10		0.132	0.139	0.1355		10		0.284	0.294	0.289
								11	B+SE	0.144	0.18	0.162		11	B+SE	0.137	0.135	0.136		11	B+SE	0.304	0.278	0.291
								12		0.156	0.159	0.1575		12		0.138	0.138	0.138		12		0.287	0.299	0.293
								13	B+Q	0.155	0.169	0.162		13	B+Q	0.134	0.139	0.1365		13	B+Q	0.288	0.289	0.2885
								14		0.169	0.164	0.1665		14		0.124	0.133	0.1285		14		0.289	0.291	0.29
								15	M+SK	0.731	0.743	0.737		15	M+SK	0.482	0.479	0.4805		15	M+SK	0.809	0.811	0.81
								16		0.711	0.742	0.7265		16		0.465	0.484	0.4745		16		0.803	0.813	0.808
								17	M+SE	0.898	0.942	0.92		17	M+SE	0.338	0.339	0.3385		17	M+SE	0.711	0.823	0.767
								18		0.924	0.912	0.918		18		0.344	0.337	0.3405		18		0.727	0.812	0.7695
								19	M+Q	0.892	0.888	0.89		19	M+Q	0.344	0.367	0.3555		19	M+Q	0.836	0.813	0.8245
								20		0.925	0.92	0.9225		20		0.355	0.336	0.3455		20		0.842	0.815	0.8285
								21	B-0	0.22	0.199	0.2095		21	B-0	0.176	0.181	0.1785		21	B-0	0.299	0.288	0.2935
								22		0.204	0.211	0.2075		22		0.184	0.183	0.1835		22		0.265	0.309	0.287
								23	B-2	0.195	0.205	0.2		23	B-2	0.157	0.162	0.1595		23	B-2	0.306	0.311	0.3085
								24		0.219	0.197	0.208		24		0.167	0.172	0.1695		24		0.307	0.302	0.3045
								25	B-3	0.163	0.18	0.1715		25	B-3	0.164	0.16	0.162		25	B-3	0.327	0.294	0.3105
								26		0.195	0.18	0.1875		26		0.152	0.164	0.158		26		0.292	0.298	0.295
								27	B-6	0.174	0.182	0.178		27	B-6	0.167	0.175	0.171		27	B-6	0.305	0.307	0.306
								28		0.177	0.174	0.1755		28		0.17	0.167	0.1685		28		0.297	0.293	0.295
								29	B-8	0.179	0.189	0.184		29	B-8	0.174	0.169	0.1715		29	B-8	0.299	0.304	0.3015
								30		0.188	0.192	0.19		30		0.163	0.162	0.1625		30		0.297	0.302	0.2995
								31	B-14	0.194	0.207	0.2005		31	B-14	0.136	0.141	0.1385		31	B-14	0.305	0.329	0.317
								32		0.214	0.213	0.2135		32		0.138	0.139	0.1385		32		0.328	0.303	0.3155
								33	B-15	0.171	0.203	0.187		33	B-15	0.139	0.135	0.137		33	B-15	0.333	0.347	0.34
								34		0.204	0.204	0.204		34		0.132	0.138	0.135		34		0.328	0.323	0.3255
								35	M-0	0.743	0.777	0.76		35	M-0	0.254	0.251	0.2525		35	M-0	0.59	0.567	0.5785
								36		0.802	0.789	0.7955		36		0.258	0.249	0.2535		36		0.576	0.609	0.5925
								37	M-2	0.651	0.678	0.6645		37	M-2	0.335	0.329	0.332		37	M-2	0.666	0.699	0.6825
								38		0.744	0.736	0.74		38		0.3044	0.31	0.3072		38		0.602	0.615	0.6085
								39	M-3	0.716	0.728	0.722		39	M-3	0.327	0.337	0.332		39	M-3	0.585	0.612	0.5985
								40		0.76	0.7	0.73		40		0.313	0.314	0.3135		40		0.701	0.662	0.6815
								41	M-6	0.695	0.736	0.7155		41	M-6	0.361	0.331	0.346		41	M-6	0.582	0.598	0.59
								42		0.726	0.655	0.6905		42		0.354	0.352	0.353		42		0.598	0.587	0.5925
								43	M-8	0.689	0.726	0.7075		43	M-8	0.36	0.377	0.3685		43	M-8	0.567	0.56	0.5635
								44		0.696	0.705	0.7005		44		0.363	0.369	0.366		44		0.592	0.603	0.5975
								45	M-14	0.748	0.746	0.747		45	M-14	0.299	0.285	0.292		45	M-14	0.512	0.537	0.5245
								46		0.749	0.735	0.742		46		0.303	0.304	0.3035		46		0.516	0.527	0.5215
								47	M-15	0.69	0.728	0.709		47	M-15	0.294	0.305	0.2995		47	M-15	0.545	0.534	0.5395
								48		0.722	0.733	0.7275		48		0.3	0.269	0.2845		48		0.538	0.521	0.5295
								17	M+SE	0.52	0.505	0.5125						#DIV/0!						#DIV/0!
								18		0.529	0.55	0.5395						#DIV/0!						#DIV/0!
								19	M+Q	0.473	0.499	0.486						#DIV/0!						#DIV/0!
								20		0.512	0.513	0.5125						#DIV/0!						#DIV/0!

## Sheet: OPA
Reference: Nielsen, P. M., Petersen, D., & Dambmann, C. (2001). Improved method for determining food protein degree of hydrolysis. Journal of food science, 66(5), 642-646.
Dilusyon Faktörü: Tüm örneklerde 50
								AĞIZ FAZI						MİDE FAZI						BAĞIRSAK FAZI
Calibration grapg of L-Serin																						1 ve 7 seyreltilmedi, kalanı 1/2 seyreltildi.
Konsantrasyon mg/ml	1.ölçüm	2.ölçüm	3.ölçüm	Ort.	SS							Ort.						Ort.						Ort.
0.01	0.183	0.18	0.187	0.0903333	0.00351188			1	C	0.071	0.063	0.011		1	C	0.149	0.155	0.096		1	C	0.226	0.223	0.1685
0.02	0.264	0.264	0.266	0.171667	0.0011547		Blank	2		0.071	0.063	0.011		2		0.149	0.155	0.096		2		0.226	0.223	0.1685
0.03	0.352	0.35	0.344	0.255667	0.00416333		0.063					0.011						0.096						0.1685
0.04	0.442	0.431	0.438	0.344	0.00556776		0.049	3	SK	0.107	0.108	0.0515		3	SK	0.15	0.156	0.097		3	SK	0.221	0.222	0.1655
0.05	0.512	0.519	0.539	0.430333	0.0140119		0.061	4		0.107	0.108	0.0515		4		0.15	0.156	0.097		4		0.221	0.222	0.1655
0.06	0.615	0.604	0.613	0.517667	0.00585947		0.051
Blank	0.093	0.094	0.093	0.0933333		Ort.	0.056	5	SE	0.1	0.092	0.04		5	SE	0.16	0.163	0.1055		5	SE	0.221	0.214	0.1615
								6		0.1	0.092	0.04		6		0.16	0.163	0.1055		6		0.221	0.214	0.1615
								7	Q	0.068	0.065	0.0105		7	Q	0.171	0.161	0.11		7	Q	0.2	0.219	0.1535
								8		0.068	0.065	0.0105		8		0.171	0.161	0.11		8		0.2	0.219	0.1535
								9	B+SK	0.163	0.16	0.1055		9	B+SK	0.324	0.33	0.271		9	B+SK	0.413	0.409	0.355
								10		0.167	0.156	0.1055		10		0.32	0.339	0.2735		10		0.415	0.402	0.3525
								11	B+SE	0.162	0.152	0.101		11	B+SE	0.366	0.367	0.3105		11	B+SE	0.383	0.386	0.3285
								12		0.159	0.154	0.1005		12		0.352	0.365	0.3025		12		0.398	0.387	0.3365
								13	B+Q	0.162	0.159	0.1045		13	B+Q	0.37	0.369	0.3135		13	B+Q	0.409	0.371	0.334
								14		0.157	0.154	0.0995		14		0.368	0.374	0.315		14		0.388	0.39	0.333
								15	M+SK	0.606	0.596	0.545		15	M+SK	0.557	0.526	0.4855		15	M+SK	0.576	0.566	0.515
								16		0.595	0.589	0.536		16		0.557	0.532	0.4885		16		0.572	0.563	0.5115
								17	M+SE	0.591	0.591	0.535		17	M+SE	0.423	0.424	0.3675		17	M+SE	0.459	0.458	0.4025
								18		0.583	0.581	0.526		18		0.426	0.425	0.3695		18		0.46	0.459	0.4035
								19	M+Q	0.656	0.655	0.5995		19	M+Q	0.607	0.614	0.5545		19	M+Q	0.866	0.859	0.8065
								20		0.646	0.642	0.588		20		0.603	0.598	0.5445		20		0.857	0.854	0.7995
							Blank	21	B-0	0.164	0.168	0.1025		21	B-0	0.385	0.385	0.3215		21	B-0	0.432	0.441	0.373
							0.062	22		0.172	0.178	0.1115		22		0.404	0.409	0.343		22		0.451	0.421	0.3725
							0.062
							0.064	23	B-2	0.158	0.157	0.094		23	B-2	0.328	0.329	0.265		23	B-2	0.382	0.383	0.319
							0.066	24		0.167	0.166	0.103		24		0.348	0.347	0.284		24		0.381	0.384	0.319
						Ort.	0.0635
								25	B-3	0.17	0.172	0.1075		25	B-3	0.349	0.35	0.286		25	B-3	0.396	0.397	0.333
								26		0.162	0.163	0.099		26		0.367	0.366	0.303		26		0.394	0.393	0.33
								27	B-6	0.168	0.169	0.105		27	B-6	0.374	0.375	0.311		27	B-6	0.392	0.393	0.329
								28		0.17	0.171	0.107		28		0.377	0.376	0.313		28		0.406	0.407	0.343
								29	B-8	0.179	0.178	0.115		29	B-8	0.39	0.391	0.327		29	B-8	0.392	0.393	0.329
								30		0.166	0.167	0.103		30		0.397	0.396	0.333		30		0.402	0.403	0.339
								31	B-14	0.165	0.164	0.101		31	B-14	0.329	0.33	0.266		31	B-14	0.4	0.401	0.337
								32		0.161	0.16	0.097		32		0.369	0.37	0.306		32		0.403	0.402	0.339
								33	B-15	0.168	0.167	0.104		33	B-15	0.366	0.367	0.303		33	B-15	0.42	0.419	0.356
								34		0.16	0.161	0.097		34		0.388	0.387	0.324		34		0.408	0.407	0.344
								35	M-0	0.629	0.613	0.559		35	M-0	0.552	0.566	0.497		35	M-0	0.631	0.656	0.5815
								36		0.605	0.647	0.564		36		0.565	0.579	0.51		36		0.664	0.652	0.596
								37	M-2	0.662	0.661	0.5995		37	M-2	0.545	0.563	0.492		37	M-2	0.562	0.574	0.506
								38		0.648	0.649	0.5865		38		0.585	0.601	0.531		38		0.583	0.574	0.5165
								39	M-3	0.624	0.623	0.5615		39	M-3	0.561	0.562	0.4995		39	M-3	0.566	0.567	0.5045
								40		0.616	0.615	0.5535		40		0.587	0.586	0.5245		40		0.573	0.574	0.5115
								41	M-6	0.619	0.62	0.5575		41	M-6	0.581	0.584	0.5205		41	M-6	0.569	0.56	0.5025
								42		0.623	0.622	0.5605		42		0.588	0.589	0.5265		42		0.552	0.553	0.4905
								43	M-8	0.636	0.637	0.5745		43	M-8	0.585	0.591	0.526		43	M-8	0.57	0.579	0.5125
								44		0.641	0.64	0.5785		44		0.581	0.585	0.521		44		0.552	0.551	0.4895
								45	M-14	0.707	0.706	0.6445		45	M-14	0.639	0.64	0.5775		45	M-14	0.57	0.569	0.5075
								46		0.674	0.675	0.6125		46		0.653	0.654	0.5915		46		0.566	0.567	0.5045
								47	M-15	0.638	0.639	0.5765		47	M-15	0.637	0.638	0.5755		47	M-15	0.559	0.56	0.4975
								48		0.645	0.644	0.5825		48		0.656	0.655	0.5935		48		0.576	0.567	0.5095
